# Supplementary material
Source: publisher figshare collection journal article supplement (https://acs.figshare.com/ndownloader/files/4454077)

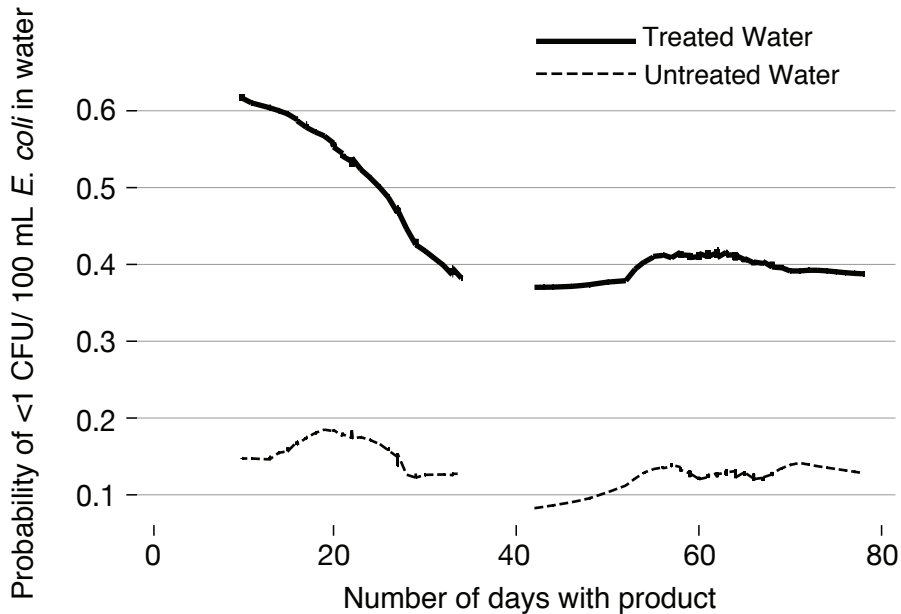

**Figure S5.**

Supplement: Supplementary file 1 [file 4454077]
